# Supplementary material
Source: Springer Nature journal article supplement (https://www.springermedizin.de/resource/supplementary/12882_2003_17_MOESM1_ESM.pdf/9454794)

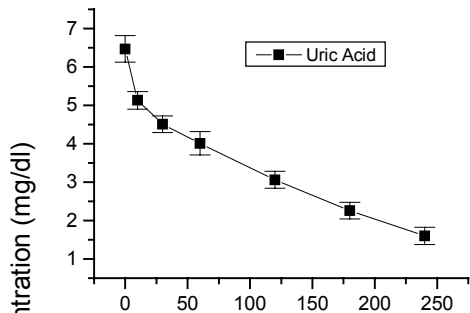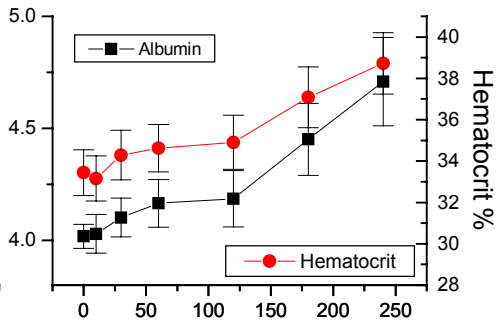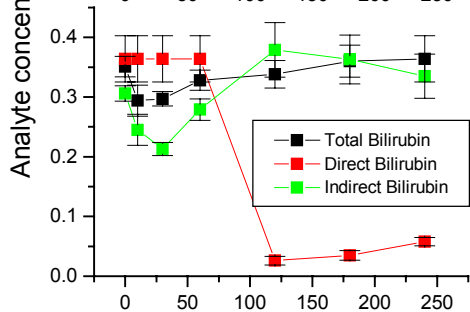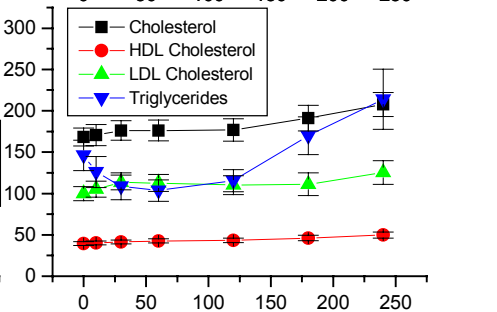

Time (min)

Supplement: MOESM1 [file 9454794]
